# Supplementary material for: Ultrafast dynamics through conical intersections and intramolecular vibrational energy redistribution in styrene
Source: Royal Society of Chemistry journal article supplement (doi:10.1039/c0cp01723j), 2010-01-01
Supplement: c0cp01723j.pdf [file c0cp01723j.pdf]

## Supplementary information

### S1. Time evolution of the excited state population

We assume Gaussian temporal profiles for the pump and probe pulses:

$$I(t) = \frac{A}{\sqrt{2\pi}\sigma} \exp\left(-\frac{1}{2} \frac{(t-t_0)^2}{\sigma^2}\right) \quad (1)$$

Neglecting any coherent effects, the population,  $f(t)$ , in any excited state,  $S_i$ , varies with time according to the formula :

$$\frac{df(t)}{dt} = \Sigma_{0i} I(t) - kf(t), \quad (2)$$

where  $\Sigma_{0i}$  is the excitation cross-section from the ground state to the electronically excited state  $S_i$ , and  $k$  is the total decay rate of the  $S_i$  state. This first order differential equation has a known solution:

$$f(t) = \exp(-kt) \int_{-\infty}^t \exp(kx) \Sigma_{0i} I(x) dx = \exp(-kt) \int_{-\infty}^t \exp(kx) \Sigma_{0i} \frac{A}{\sqrt{2\pi}\sigma} \exp\left(-\frac{1}{2} \frac{(x-t_0)^2}{\sigma^2}\right) dx$$

The convolution of the exponential and the Gaussian functions can be simplified and expressed in terms of the error function (see section S2), thus the time-evolution of the population in the excited state can be described by :

$$f(t) = \exp(-kt) \Sigma_{0i} \frac{A}{2} \exp\left(\frac{\sigma^2 k^2}{2} + kt_0\right) \left(1 + \operatorname{erf}\left(\frac{t-t_0-\sigma^2 k}{\sqrt{2}\sigma}\right)\right) \quad (3)$$

The decay rate,  $k$ , is related to the decay time,  $\tau$ , by  $k = 1/\tau$ . By substituting for  $\tau$  and setting  $N = \Sigma_{0i} A/2$ , we obtain equation (1) in the main paper:

$$f(t) = N \exp\left(\frac{\sigma^2}{2\tau^2} + \frac{t_0}{\tau} - \frac{t}{\tau}\right) \left(1 + \operatorname{erf}\left(\frac{t-t_0-\sigma^2}{\tau\sigma\sqrt{2}}\right)\right). \quad (4)$$

### S2. Convolution of the exponential and Gauss functions

In order to solve the convolution integral,

$$\int_{-\infty}^t \exp(kx) \exp\left(-\frac{1}{2} \frac{(x-t_0)^2}{\sigma^2}\right) dx = \int_{-\infty}^t \exp\left(kx - \frac{1}{2} \frac{(x-t_0)^2}{\sigma^2}\right) dx, \quad (5)$$

the exponent in equation (5) has to be rearranged as shown below.

$$\begin{aligned} kx - \frac{1}{2} \frac{(x-t_0)^2}{\sigma^2} &= -\frac{1}{2} \frac{(x-t_0)^2}{\sigma^2} + k(x-t_0) - kt_0 = -\frac{(x-t_0)^2 - 2\sigma^2 k(x-t_0)}{2\sigma^2} + kt_0 = \\ &= -\frac{(x-t_0)^2 - 2\sigma^2 k(x-t_0) + \sigma^4 k^2 - \sigma^4 k^2}{2\sigma^2} + kt_0 = -\frac{(x-t_0 - \sigma^2 k)^2}{2\sigma^2} + \frac{\sigma^2 k^2}{2} + kt_0 \end{aligned}$$

To simplify this expression, a new variable,  $y$ , and an upper integration limit,  $t'$ , is introduced as defined below:

$$y = \frac{x - t_0 - \sigma^2 k}{\sqrt{2}\sigma}, \quad dx = \sqrt{2}\sigma dy, \quad t' = \frac{t - t_0 - \sigma^2 k}{\sqrt{2}\sigma} \quad (6)$$

Combining the above mathematical transformations gives the resultant integral:

$$\int_{-\infty}^t \exp\left(kx - \frac{1}{2} \frac{(x - t_0)^2}{\sigma^2}\right) dx = \exp\left(\frac{\sigma^2 k^2}{2} + kt_0\right) \sqrt{2}\sigma \int_{-\infty}^{t'} \exp(-y^2) dy \quad (7)$$

Using the standard integral  $\int_{-\infty}^0 \exp(-y^2) dy = \frac{\sqrt{\pi}}{2}$ , expression (7) can now be derived

via the error function,  $\int_0^{t'} \exp(-y^2) dy = \frac{\sqrt{\pi}}{2} \text{erf}(t')$ , as shown below :

$$\begin{aligned} \int_{-\infty}^t \exp(kx) \exp\left(-\frac{1}{2} \frac{(x - t_0)^2}{\sigma^2}\right) dx &= \exp\left(\frac{\sigma^2 k^2}{2} + kt_0\right) \sqrt{2}\sigma \int_{-\infty}^{t'} \exp(-y^2) dy \\ &= \exp\left(\frac{\sigma^2 k^2}{2} + kt_0\right) \sqrt{2}\sigma \left( \int_{-\infty}^0 \exp(-y^2) dy + \int_0^{t'} \exp(-y^2) dy \right) \\ &= \exp\left(\frac{\sigma^2 k^2}{2} + kt_0\right) \sigma \left( \sqrt{\frac{\pi}{2}} + \sqrt{\frac{\pi}{2}} \text{erf}(t') \right) \\ &= \exp\left(\frac{\sigma^2 k^2}{2} + kt_0\right) \sigma \sqrt{\frac{\pi}{2}} \left( 1 + \text{erf}\left(\frac{t - t_0 - \sigma^2 k}{\sqrt{2}\sigma}\right) \right) \end{aligned}$$
